# Supplementary material for: Combinations of soil properties, carbon inputs and climate control the saturation deficit dynamics of stable soil carbon over 17-year fertilizaiton
Source: PubMed Central journal article supplement (PMC6107555; doi:10.1038/s41598-018-31028-x), 2018-08-23
Supplement: 41598_2018_31028_MOESM1_ESM.pdf [file 41598_2018_31028_MOESM1_ESM.pdf]

## Supplementary information for

### **Soil properties, carbon inputs, and climate combine to control the stable soil carbon saturation deficit dynamics over different 17-year fertilizations**

Jiaying Di<sup>1,2</sup>, Minggang Xu<sup>1,\*</sup>, Wenju Zhang<sup>1</sup>, Xiaogang Tong<sup>3</sup>, Xinhua He<sup>4,5</sup>,  
Hongjun Gao<sup>6</sup>, Hua Liu<sup>7</sup> & Boren Wang<sup>1</sup>

<sup>1</sup> *National Engineering Laboratory for Improving Quality of Arable Land, Institute of Agricultural Resources and Regional Planning, Chinese Academy of Agricultural Sciences, Beijing 100081, China*

<sup>2</sup> *Key Laboratory of Agro-information Services Technology of Ministry of Agriculture, Agriculture Information Institute of Chinese Academy of Agricultural Sciences, Beijing 100081, China*

<sup>3</sup> *College of Resources and Environment, Northwest A & F University, Yangling, Shannxi 712100, China*

<sup>4</sup> *College of Resources and Environment, Southwest University, Chongqing 400715, China*

<sup>5</sup> *School of Plant Biology, University of Western Australia, Crawley, WA 6009, Australia*

<sup>6</sup> *Centre of Agricultural Environment and Resources, Jilin Academy of Agricultural Sciences, Changchun 130033, China*

<sup>7</sup> *Institute of Soil and Fertilizer, Xinjiang Academy of Agricultural Sciences, Urumqi, China*

**\*Corresponding authors.**

E-mail address: [xuminggang@caas.cn](mailto:xuminggang@caas.cn) (M.G. Xu)

**Table S1. Coefficient values of the 13 predictor variable of the lasso regression model at the three long-term experimental sites.** TOC, total soil organic content; TN, total soil nitrogen; AN, available nitrogen; TP, total phosphorus; AP, available phosphorus; BD, bulk density; pH, soil pH; MAP, mean annual precipitation; MAT, mean annual temperature; Cum\_T > 10°C, effective cumulative temperature >10°C; Cum\_C input, cumulative C input amount C input\_R, crop residue-C input amount; C input\_M/S, the extra organic C input amount (i.e., manure or straw).

| Category        | Predictor variable | Coefficient value |        |        |
|-----------------|--------------------|-------------------|--------|--------|
|                 |                    | Gongzhuling       | Qiyang | Urumqi |
| Soil properties | TOC                | -4.63             | -4.19  | -11.82 |
|                 | TN                 | -4.18             | 0.00   | 0.00   |
|                 | AN                 | 0.00              | 0.00   | 0.00   |
|                 | TP                 | 10.13             | 0.00   | 0.00   |
|                 | AP                 | -11.30            | 0.00   | 0.00   |
|                 | BD                 | 2.23              | 0.00   | 0.00   |
|                 | pH                 | 0.00              | 0.00   | 4.02   |
| Climate         | MAP                | 0.00              | 0.00   | 0.00   |
|                 | MAT                | -1.21             | 0.00   | -3.53  |
|                 | Cum_T              | -0.24             | 2.77   | 0.00   |
| C inputs        | Cum_C input        | 0.00              | 0.00   | 0.00   |
|                 | C input_R          | -5.28             | 0.00   | 0.00   |
|                 | C input_M/R        | 0.00              | -15.05 | -9.72  |

**Table S2. Application rates of mineral fertilizers at the three long-term experimental sites.** N, mineral nitrogen; NP, mineral N and phosphorus; NPK, mineral N, phosphorus, and potassium combination; NPKS, NPK plus crop straw return; NPKM, NPK plus livestock manure; hNPKM, higher rates of mineral fertilizer and manure input.

| Site        | Crops            | N/NP/NPK                                                 | NPKS      | NPKM     | hNPKM     |
|-------------|------------------|----------------------------------------------------------|-----------|----------|-----------|
|             |                  | Mineral N-P-K<br>(kg ha <sup>-1</sup> yr <sup>-1</sup> ) |           |          |           |
| Gongzhuling | Corn             | 165-36-68                                                | 112-36-68 | 50-36-68 | 75-54-103 |
| Qiyang      | Corn             | 210-36-70                                                | 210-36-70 | 63-36-70 | 94-54-105 |
|             | Wheat            | 90-15-30                                                 | 90-15-30  | 27-15-30 | 40-23-45  |
| Urumqi      | Corn/wheat/wheat | 241-59-48                                                | 217-50-42 | 85-22-10 | 150-39-15 |

**Table S3. Sources and application rates of organic amendments in various fertilizer treatments at the three long-term experimental sites.** NPK, mineral N, phosphorus, and potassium combination; NPKS, NPK plus crop straw return; NPKM, NPK plus livestock manure; hNPKM, higher rates of mineral fertilizer and manure input.

| Site        | NPKS   | NPKM/hNPKM | NPKS                                                     | NPKM | hNPKM |
|-------------|--------|------------|----------------------------------------------------------|------|-------|
|             | Source |            | Application rate (Mg ha <sup>-1</sup> yr <sup>-1</sup> ) |      |       |
| Gongzhuling | CS     | PM         | 7.5                                                      | 23   | 34.6  |
| Qiyang      | WS     | PM         | Half <sup>&amp;</sup>                                    | 29   | 44    |
|             | CS     | PM         | Half <sup>&amp;</sup>                                    | 13   | 19    |
| Urumqi      | CS/WS  | GM         | All <sup>&amp;</sup>                                     | 30   | 60    |

CS: corn straw, WS: wheat straw, PM: pig manure, GM: goat manure. <sup>&</sup>: Half or all crop straw of the previous season was returned back to the soil.

**Table S4. The 13 predictor variables of the lasso regression model at the three long-term experimental sites.**

| Category        | Predictor variable | Description                                          | Unit                |
|-----------------|--------------------|------------------------------------------------------|---------------------|
| Soil properties | TOC                | total soil organic carbon                            | g kg <sup>-1</sup>  |
|                 | TN                 | total soil nitrogen                                  | g kg <sup>-1</sup>  |
|                 | AN                 | available nitrogen                                   | g kg <sup>-1</sup>  |
|                 | TP                 | total phosphorus                                     | g kg <sup>-1</sup>  |
|                 | AP                 | available phosphorus                                 | mg kg <sup>-1</sup> |
|                 | BD                 | bulk density                                         | g cm <sup>-3</sup>  |
|                 | pH                 | soil pH                                              |                     |
| Climate         | MAP                | mean annual precipitation                            | mm                  |
|                 | MAT                | mean annual temperature                              | °C                  |
|                 | Cum_T              | effective cumulative temperature >10°C               | °C                  |
| C inputs        | Cum_C input        | cumulative C input amount                            | Mg ha <sup>-1</sup> |
|                 | C input_R          | crop residue C input amount                          | Mg ha <sup>-1</sup> |
|                 | C input_M/R        | extra organic C input amount include manure or straw | Mg ha <sup>-1</sup> |

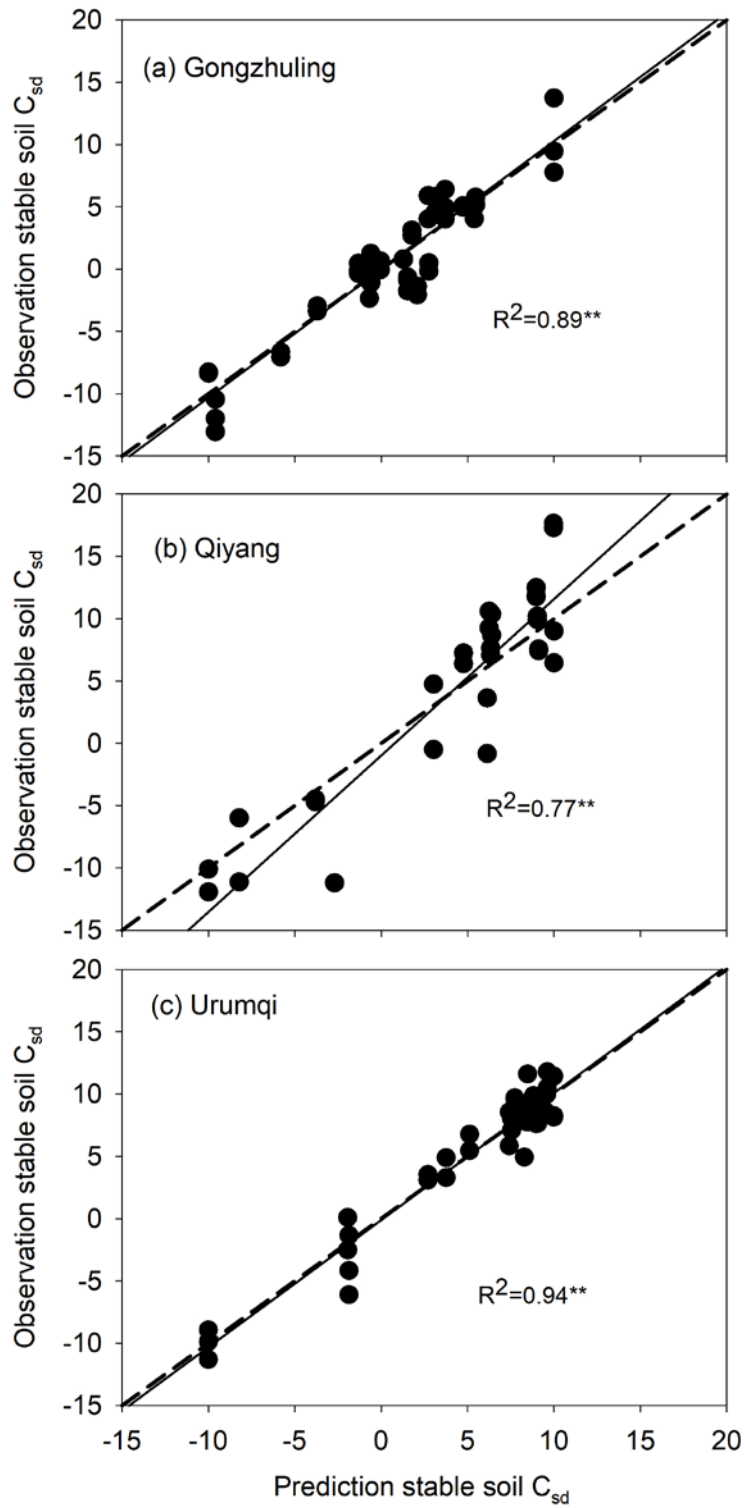

Figure S1. Observed values and values predicted by the lasso linear regression model using the predictors shown in Fig. 3. The dashed line shows the 1:1 line (in all sites  $P < 0.01$ , denoted by two asterisks).
